# Supplementary material for: Significantly improved kinetics, reversibility and cycling stability for hydrogen storage in NaAlH4with the Ti-incorporated metal organic framework MIL-125(Ti)
Source: Royal Society of Chemistry journal article supplement (doi:10.1039/c3ta14202g), 2013-12-17
Supplement: c3ta14202g.pdf [file c3ta14202g.pdf]

## Electronic Supplementary Information

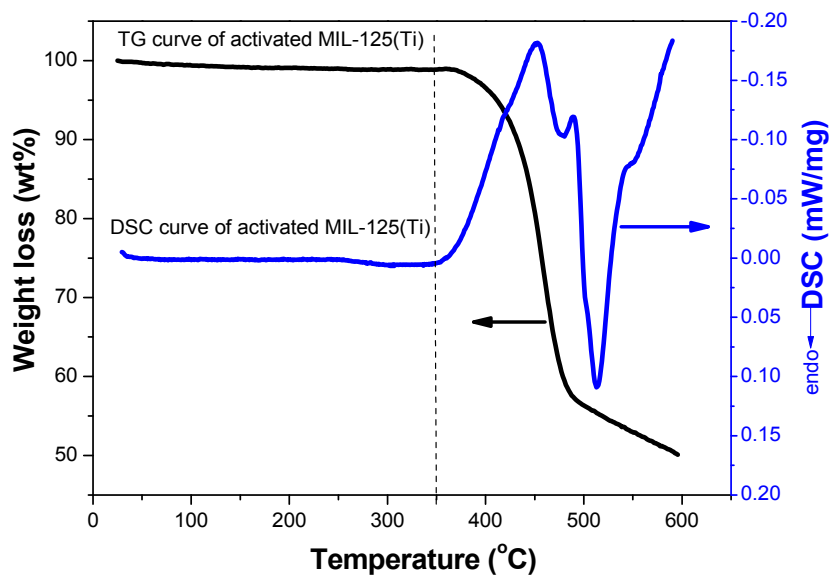

Fig. S1 TG-DSC curves of activated MIL-125(Ti) under Ar

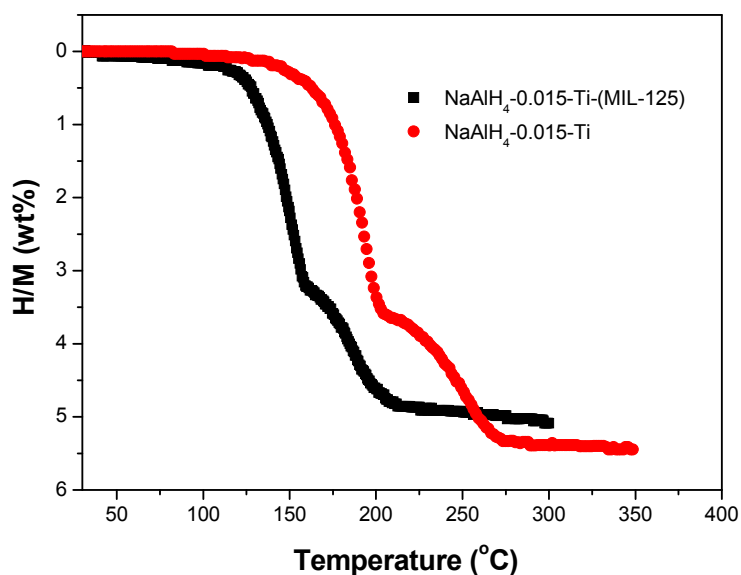

Fig. S2 Dehydrogenation behaviors of the post-milled NaAlH<sub>4</sub>-0.015Ti-(MIL-125) and NaAlH<sub>4</sub>-0.015Ti-(metallic Ti).

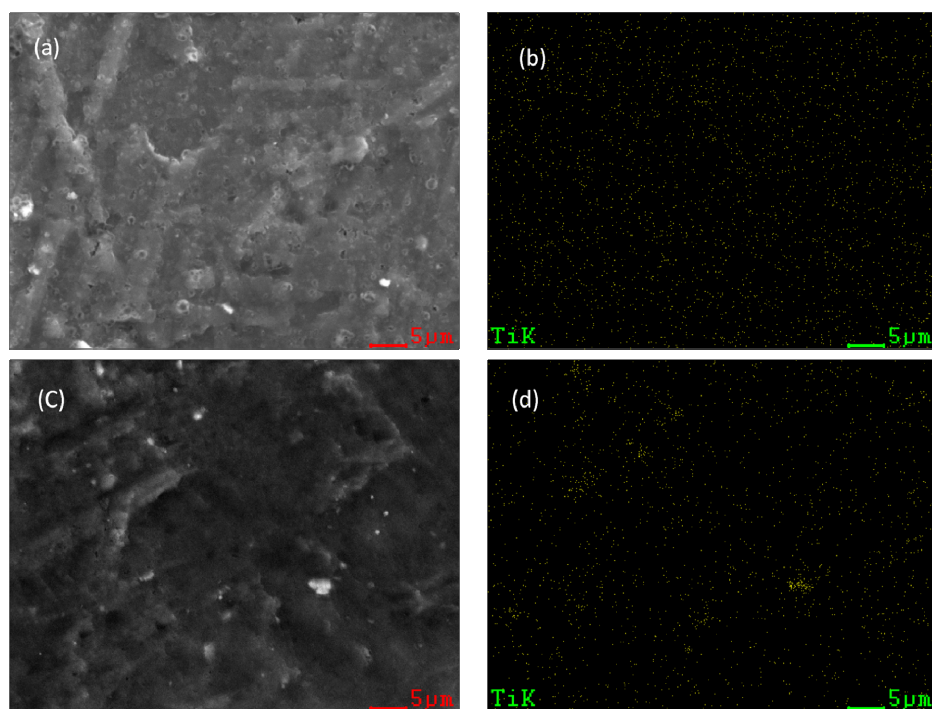

**Fig. S3** SEM images (a, c) and the corresponding EDS maps of the elemental Ti (b, d) in the NaAlH<sub>4</sub>-0.015Ti-(MIL-125) (a, b) and NaAlH<sub>4</sub>-0.015Ti-(metallic Ti) (c, d).

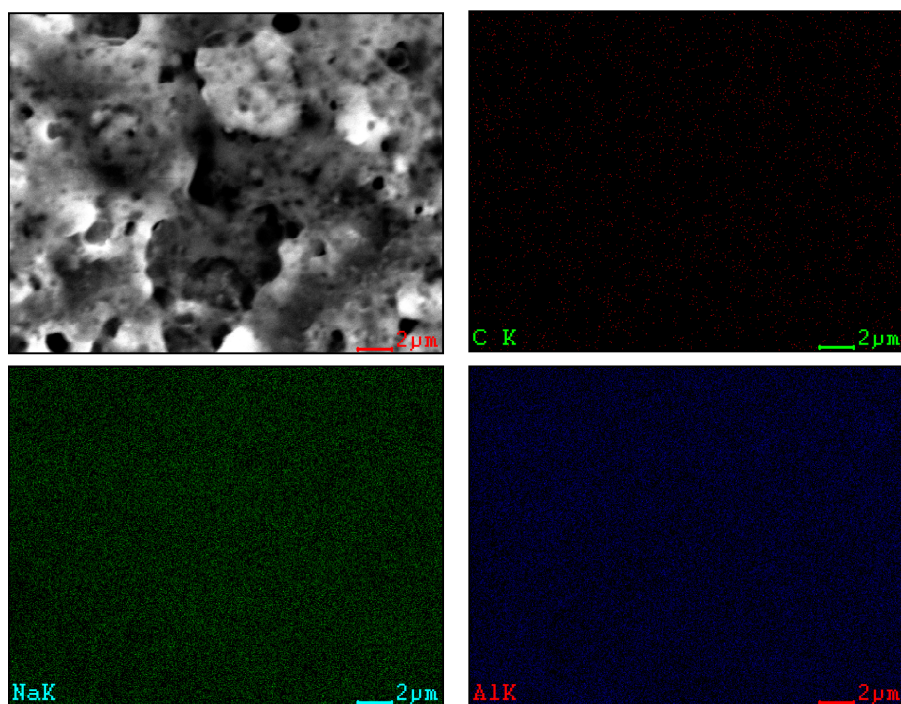

**Fig. S4** EDS maps of the elemental Na, Al and C in the hydrogenated sample with MIL-125.
